# Supplementary material
Source: PubMed Central journal article supplement (PMC5298939)
Supplement: NIHMS839969-supplement-Supp_Table_S3.pdf [file NIHMS839969-supplement-Supp_Table_S3.pdf]

**Table S3.** List of SNPs genotyped and analyzed in this study. The list includes SNPs spanning candidate genes listed in Table S1. LD blocks were identified using Haploview, and are indicated in the final column. The number refers to the LD block number within the gene/region. \*s indicates a singlet not part of a LD block. Rows in bold and underlined indicate a SNP that was retained after SNP pruning to determine the number of LD blocks for Bonferroni correction, as described in the methods.

| SNP                      | Bp Position             | Chromosome      | LD block number |
|--------------------------|-------------------------|-----------------|-----------------|
| <b><u>rs12062820</u></b> | <b><u>65743082</u></b>  | <b><u>1</u></b> | <b><u>s</u></b> |
| rs4655517                | 65812012                | 1               | s               |
| rs1137101                | 65831100                | 1               | s               |
| rs8179183                | 65848539                | 1               | s               |
| <b><u>rs4657039</u></b>  | <b><u>159729351</u></b> | <b><u>1</u></b> | <b><u>s</u></b> |
| rs10800309               | 159738781               | 1               | 1               |
| rs4656308                | 159745374               | 1               | 1               |
| rs1801274                | 159746368               | 1               | s               |
| <b><u>rs3024498</u></b>  | <b><u>205008151</u></b> | <b><u>1</u></b> | <b><u>2</u></b> |
| rs1878672                | 205010335               | 1               | 2               |
| rs3024493                | 205010590               | 1               | 2               |
| rs1554286                | 205010855               | 1               | 2               |
| rs1518111                | 205011267               | 1               | 2               |
| rs3021094                | 205011574               | 1               | s               |
| rs3731863                | 218960451               | 2               | 1               |
| <b><u>rs2290708</u></b>  | <b><u>218960620</u></b> | <b><u>2</u></b> | <b><u>1</u></b> |
| rs3816560                | 218963085               | 2               | 1               |
| rs2695343                | 218963666               | 2               | 1               |
| rs2279015                | 218967513               | 2               | 2               |
| rs1059823                | 218968087               | 2               | 2               |
| rs2279014                | 218969419               | 2               | 2               |
| rs10187726               | 227580989               | 2               | s               |
| rs2276593                | 227606677               | 2               | s               |
| rs12474622               | 227621036               | 2               | 3               |
| rs10178202               | 227622804               | 2               | 3               |
| rs10187611               | 227655296               | 2               | s               |
| rs10179198               | 227664907               | 2               | s               |
| <b><u>rs7558081</u></b>  | <b><u>227666712</u></b> | <b><u>2</u></b> | <b><u>s</u></b> |
| rs12989872               | 227668216               | 2               | s               |
| rs16823202               | 227674391               | 2               | s               |
| rs7602059                | 227676796               | 2               | s               |
| rs7600536                | 227681338               | 2               | s               |
| rs6436654                | 227682356               | 2               | s               |
| rs6743614                | 227686136               | 2               | 4               |
| rs11686140               | 227686275               | 2               | 4               |
| rs6713185                | 227694649               | 2               | 5               |
| rs4337467                | 227701711               | 2               | 5               |
| rs1882434                | 227705283               | 2               | 5               |
| <b><u>rs2396453</u></b>  | <b><u>227709423</u></b> | <b><u>2</u></b> | <b><u>s</u></b> |
| <b><u>rs7558432</u></b>  | <b><u>227714149</u></b> | <b><u>2</u></b> | <b><u>s</u></b> |
| rs10173673               | 227721655               | 2               | 6               |
| rs12468501               | 227722845               | 2               | 6               |

|                   |                  |          |           |
|-------------------|------------------|----------|-----------|
| rs9636346         | 227724444        | 2        | s         |
| rs10187310        | 227725830        | 2        | s         |
| rs1574248         | 227727028        | 2        | s         |
| <b>rs1922021</b>  | <b>227733999</b> | <b>2</b> | <b>7</b>  |
| rs6735744         | 227744445        | 2        | 7         |
| rs6785358         | 30619218         | 3        | 1         |
| rs6770038         | 30625330         | 3        | 1         |
| rs1835538         | 30630484         | 3        | 2         |
| <b>rs1991657</b>  | <b>30633034</b>  | <b>3</b> | <b>2</b>  |
| rs1864616         | 30640231         | 3        | 3         |
| rs17025785        | 30642428         | 3        | 3         |
| rs4522809         | 30643687         | 3        | 3         |
| rs12490899        | 30649257         | 3        | 4         |
| rs11924422        | 30652487         | 3        | 4         |
| rs13083813        | 30654561         | 3        | 4         |
| <b>rs17025857</b> | <b>30656098</b>  | <b>3</b> | <b>5</b>  |
| rs12493607        | 30657942         | 3        | 5         |
| rs2082224         | 30664758         | 3        | s         |
| rs1078985         | 30665914         | 3        | 6         |
| rs2029314         | 30667222         | 3        | 6         |
| rs9831477         | 30668525         | 3        | 6         |
| rs1036097         | 30668646         | 3        | 6         |
| rs10510636        | 30673099         | 3        | 6         |
| rs3773636         | 30675444         | 3        | s         |
| rs6792117         | 30679010         | 3        | s         |
| rs1551762         | 30681393         | 3        | 7         |
| rs3773644         | 30687347         | 3        | 7         |
| rs3773649         | 30691605         | 3        | 7         |
| rs3773650         | 30693432         | 3        | 8         |
| <b>rs3773652</b>  | <b>30693945</b>  | <b>3</b> | <b>8</b>  |
| rs2043136         | 30695307         | 3        | 8         |
| rs4955104         | 30696706         | 3        | s         |
| rs1346907         | 30698473         | 3        | s         |
| rs9843143         | 30704232         | 3        | s         |
| <b>rs9843942</b>  | <b>30704639</b>  | <b>3</b> | <b>s</b>  |
| rs3773663         | 30705875         | 3        | 9         |
| rs11466531        | 30708841         | 3        | 9         |
| rs744751          | 30710940         | 3        | 9         |
| rs2243115         | 161188973        | 3        | 10        |
| <b>rs583911</b>   | <b>161193083</b> | <b>3</b> | <b>10</b> |
| rs2243131         | 161194751        | 3        | 10        |
| rs568408          | 161196160        | 3        | 10        |
| rs2243143         | 161197495        | 3        | 10        |
| rs907715          | 123754502        | 4        | 1         |
| rs2221903         | 123758361        | 4        | 1         |
| rs2055979         | 123760190        | 4        | 1         |
| <b>rs13143866</b> | <b>123760207</b> | <b>4</b> | <b>1</b>  |
| rs3806798         | 142776728        | 4        | 2         |
| rs12508866        | 142785142        | 4        | 2         |
| rs1519551         | 142789921        | 4        | 2         |
| rs12510514        | 142820945        | 4        | s         |
| rs13112582        | 142835455        | 4        | s         |
| rs6850492         | 142856754        | 4        | s         |
| <b>rs2087849</b>  | <b>142857660</b> | <b>4</b> | <b>3</b>  |
| rs10519612        | 142873150        | 4        | 3         |

|                  |                  |           |          |
|------------------|------------------|-----------|----------|
| rs10833          | 142873996        | 4         | s        |
| rs40401          | 131424376        | 5         | 1        |
| rs31481          | 131425100        | 5         | 1        |
| <b>rs743564</b>  | <b>131438777</b> | <b>5</b>  | <b>2</b> |
| rs25881          | 131439036        | 5         | 2        |
| rs25882          | 131439358        | 5         | 2        |
| <b>rs20541</b>   | <b>132023862</b> | <b>5</b>  | <b>s</b> |
| rs2243248        | 132036542        | 5         | s        |
| rs2227282        | 132041077        | 5         | 3        |
| <b>rs2243263</b> | <b>132041197</b> | <b>5</b>  | <b>3</b> |
| rs1368439        | 158674591        | 5         | 4        |
| rs2853697        | 158675980        | 5         | 4        |
| <b>rs919766</b>  | <b>158680141</b> | <b>5</b>  | <b>4</b> |
| rs3213097        | 158681256        | 5         | 4        |
| rs2853694        | 158681665        | 5         | s        |
| rs2569253        | 158683570        | 5         | s        |
| rs3181216        | 158685555        | 5         | s        |
| rs1433048        | 158688422        | 5         | 5        |
| rs2546893        | 158688537        | 5         | 5        |
| rs1041981        | 31648762         | 6         | 1        |
| rs1799964        | 31650286         | 6         | 1        |
| rs1800630        | 31650454         | 6         | 1        |
| rs1800629        | 31651009         | 6         | 1        |
| rs3093662        | 31652167         | 6         | s        |
| <b>rs2256974</b> | <b>31663370</b>  | <b>6</b>  | <b>2</b> |
| rs1052248        | 31664559         | 6         | 2        |
| rs4896243        | 137556482        | 6         | s        |
| rs3799488        | 137561472        | 6         | s        |
| rs1327475        | 137578147        | 6         | s        |
| rs9376269        | 137581197        | 6         | s        |
| <b>rs1327474</b> | <b>137582767</b> | <b>6</b>  | <b>s</b> |
| rs12529779       | 137587798        | 6         | s        |
| <b>rs608914</b>  | <b>137588730</b> | <b>6</b>  | <b>s</b> |
| rs477768         | 137590329        | 6         | s        |
| <b>rs7874183</b> | <b>100888406</b> | <b>9</b>  | <b>s</b> |
| rs6478974        | 100914223        | 9         | s        |
| rs10739778       | 100915609        | 9         | s        |
| rs10733710       | 100947244        | 9         | 1        |
| rs334355         | 100949106        | 9         | 1        |
| rs3781093        | 8141932          | 10        | s        |
| rs3824662        | 8144213          | 10        | s        |
| rs568727         | 8146706          | 10        | s        |
| <b>rs569421</b>  | <b>8148597</b>   | <b>10</b> | <b>s</b> |
| rs1860545        | 6317037          | 12        | s        |
| rs4149578        | 6317697          | 12        | s        |
| rs4149577        | 6317782          | 12        | s        |
| rs4149576        | 6319375          | 12        | s        |
| rs4149570        | 6321850          | 12        | s        |
| rs11064145       | 6325358          | 12        | s        |
| <b>rs3764875</b> | <b>6328344</b>   | <b>12</b> | <b>s</b> |
| rs3782723        | 6336315          | 12        | s        |
| rs10849445       | 6337706          | 12        | s        |
| rs6489711        | 6338563          | 12        | s        |
| rs7956915        | 6340520          | 12        | s        |
| <b>rs7973914</b> | <b>6346983</b>   | <b>12</b> | <b>s</b> |

|                   |                  |           |          |
|-------------------|------------------|-----------|----------|
| <b>rs2286600</b>  | <b>6353046</b>   | <b>12</b> | <b>S</b> |
| <b>rs1044189</b>  | <b>6923409</b>   | <b>12</b> | <b>S</b> |
| rs744167          | 6924168          | 12        | S        |
| rs7310161         | 6927394          | 12        | S        |
| rs759052          | 6939880          | 12        | S        |
| rs2069727         | 66834489         | 12        | S        |
| rs2069718         | 66836428         | 12        | S        |
| rs2069716         | 66837081         | 12        | S        |
| <b>rs1861493</b>  | <b>66837462</b>  | <b>12</b> | <b>S</b> |
| rs838893          | 123835427        | 12        | S        |
| rs11057820        | 123862916        | 12        | S        |
| rs4765615         | 123865782        | 12        | S        |
| rs10846745        | 123878564        | 12        | S        |
| rs4765178         | 123879011        | 12        | S        |
| <b>rs10773107</b> | <b>123883343</b> | <b>12</b> | <b>S</b> |
| <b>rs10846749</b> | <b>123884400</b> | <b>12</b> | <b>S</b> |
| rs4765180         | 123884724        | 12        | S        |
| rs4765622         | 123886780        | 12        | S        |
| <b>rs10773109</b> | <b>123888947</b> | <b>12</b> | <b>S</b> |
| rs7306660         | 123893336        | 12        | S        |
| rs12370382        | 123893356        | 12        | S        |
| rs7954697         | 123901205        | 12        | S        |
| rs4765181         | 123905180        | 12        | S        |
| rs12831105        | 123908872        | 12        | S        |
| rs7139401         | 123911400        | 12        | S        |
| rs3809569         | 64786881         | 15        | S        |
| <b>rs2119261</b>  | <b>64799033</b>  | <b>15</b> | <b>S</b> |
| <b>rs11853853</b> | <b>64809523</b>  | <b>15</b> | <b>1</b> |
| rs2439385         | 64813914         | 15        | 1        |
| rs12906898        | 64833849         | 15        | S        |
| rs2414912         | 64835411         | 15        | 2        |
| rs4776829         | 64837681         | 15        | 2        |
| rs7180265         | 64841126         | 15        | 3        |
| rs7173030         | 64843624         | 15        | 3        |
| rs12906270        | 64847909         | 15        | S        |
| rs6498011         | 27239394         | 16        | S        |
| rs4787948         | 27248559         | 16        | 1        |
| <b>rs3024544</b>  | <b>27260857</b>  | <b>16</b> | <b>1</b> |
| <b>rs3024560</b>  | <b>27264167</b>  | <b>16</b> | <b>S</b> |
| rs2239347         | 27266521         | 16        | S        |
| rs3024585         | 27267344         | 16        | S        |
| rs3024613         | 27271753         | 16        | 2        |
| rs3024630         | 27273626         | 16        | 2        |
| rs3024647         | 27275472         | 16        | 2        |
| rs3024672         | 27280631         | 16        | S        |
| rs3024676         | 27281058         | 16        | 3        |
| <b>rs1805011</b>  | <b>27281372</b>  | <b>16</b> | <b>3</b> |
| rs1801275         | 27281900         | 16        | 3        |
| rs8832            | 27283287         | 16        | S        |
| rs3760396         | 29605553         | 17        | S        |
| rs4586            | 29607381         | 17        | 1        |
| rs7224013         | 29620574         | 17        | 1        |
| rs3091237         | 29621915         | 17        | 1        |
| rs3091321         | 29621984         | 17        | 1        |
| rs3091322         | 29623972         | 17        | 1        |

|                   |                 |              |          |
|-------------------|-----------------|--------------|----------|
| <b>rs1476759</b>  | <b>29624262</b> | <b>17</b>    | <b>1</b> |
| rs4796120         | 31225003        | 17           | 2        |
| <b>rs2280789</b>  | <b>31231115</b> | <b>17</b>    | <b>2</b> |
| rs1967293         | 31415386        | 17           | s        |
| rs712043          | 31420779        | 17           | s        |
| <b>rs10491121</b> | <b>31454448</b> | <b>17</b>    | <b>3</b> |
| rs1719141         | 31454562        | 17           | 3        |
| rs2023906         | 35967211        | 17           | s        |
| rs2290065         | 35969885        | 17           | s        |
| <b>rs3136685</b>  | <b>35973324</b> | <b>17</b>    | <b>s</b> |
| rs2074190         | 43166208        | 17           | s        |
| rs10514934        | 43167122        | 17           | s        |
| rs16946264        | 43168432        | 17           | 4        |
| rs2158079         | 43173548        | 17           | 4        |
| rs11650354        | 43177090        | 17           | 4        |
| <b>rs11657479</b> | <b>43177899</b> | <b>17</b>    | <b>s</b> |
| rs16947058        | 43180184        | 17           | s        |
| rs11874392        | 44707153        | 18           | 1        |
| rs12953717        | 44707926        | 18           | 1        |
| <b>rs2337107</b>  | <b>44713320</b> | <b>18</b>    | <b>2</b> |
| rs2337106         | 44714900        | 18           | 2        |
| rs7238442         | 44715783        | 18           | 2        |
| <b>rs1873191</b>  | <b>44722248</b> | <b>18</b>    | <b>s</b> |
| rs3736242         | 44728743        | 18           | s        |
| <b>rs428253</b>   | <b>4180912</b>  | <b>19</b>    | <b>s</b> |
| <b>rs8112310</b>  | <b>7710319</b>  | <b>19</b>    | <b>s</b> |
| rs10410342        | 7714451         | 19           | s        |
| rs8105572         | 7715326         | 19           | 1        |
| <b>rs2287886</b>  | <b>7718535</b>  | <b>19</b>    | <b>1</b> |
| rs735239          | 7719267         | 19           | 1        |
| rs735240          | 7719335         | 19           | 1        |
| rs2306192         | 14004015        | chr19        | 2        |
| rs2306191         | 14004150        | chr19        | 2        |
| <b>rs2306190</b>  | <b>14023675</b> | <b>chr19</b> | <b>s</b> |
| rs2284553         | 33698564        | 21           | s        |
| rs9808685         | 33707541        | 21           | 1        |
| rs9808753         | 33709181        | 21           | 1        |
| rs2834212         | 33712728        | 21           | 1        |
| rs2834213         | 33714779        | 21           | 2        |
| rs2012075         | 33718631        | 21           | 2        |
| <b>rs1532</b>     | <b>33726835</b> | <b>21</b>    | <b>2</b> |
